# Supplementary material for: Real World Treatment Practices for Mantle Cell Lymphoma in Japan: An Observational Database Research Study (CLIMBER-DBR)
Source: PubMed Central journal article supplement — J Clin Exp Hematop. 2021 Jun 5;61(3):135–44. doi: 10.3960/jslrt.20056 (PMC8519241; doi:10.3960/jslrt.20056), 2021-06-05
Supplement: jslrt-61-135-s001.pdf [file jslrt-61-135-s001.pdf]

## Supplementary Materials

Supplementary Table S1. Treatments prescribed to  $\geq 2\%$  of patients with MCL by treatment line

| First-line treatment<br>N = 802 |             | Second-line treatment<br>N = 408 |            | Third-line treatment<br>N = 213 |            |
|---------------------------------|-------------|----------------------------------|------------|---------------------------------|------------|
| BR                              | 223 (27.8%) | BR                               | 77 (18.9%) | BR                              | 29 (13.6%) |
| R-CHOP                          | 125 (15.6%) | Ibrutinib                        | 41 (10.0%) | Ibrutinib                       | 26 (12.2%) |
| R-THP-COP                       | 52 (6.5%)   | B                                | 26 (6.4%)  | R                               | 12 (5.6%)  |
| VR-CAP                          | 47 (5.9%)   | Etoposide (VP16)                 | 14 (3.4%)  | B                               | 8 (3.8%)   |
| R                               | 41 (5.1%)   | Ibritumomab tiuxetan             | 14 (3.4%)  | R-ICE                           | 5 (2.3%)   |
| R-Hyper-CVAD/MA                 | 34 (4.2%)   | R-CHOP                           | 12 (2.9%)  |                                 |            |
| Ibrutinib                       | 20 (2.5%)   | MEAM                             | 11 (2.7%)  |                                 |            |
| B                               | 19 (2.4%)   | R-Hyper-CVAD/MA                  | 10 (2.5%)  |                                 |            |
|                                 |             | VR-CAP                           | 10 (2.5%)  |                                 |            |
|                                 |             | CHASER                           | 9 (2.2%)   |                                 |            |
|                                 |             | MA                               | 8 (2.0%)   |                                 |            |

B, bendamustine; R, rituximab; CHOP, cyclophosphamide/doxorubicin/vincristine/prednisolone; VR-CAP, bortezomib/rituximab/cyclophosphamide/doxorubicin/prednisolone; THP, tetrahydropyranil-adriamycin; COP, cyclophosphamide/vincristine/prednisolone; hyper-CVAD, hyperfractionated cyclophosphamide/vincristine/doxorubicin/dexamethasone; MEAM, ranimustine/etoposide/cytarabine/melphalan; CHASER, cyclophosphamide/cytarabine/dexamethasone/etoposide/rituximab; MA, methotrexate/cytarabine; ICE, ifosfamide/carboplatin/etoposide

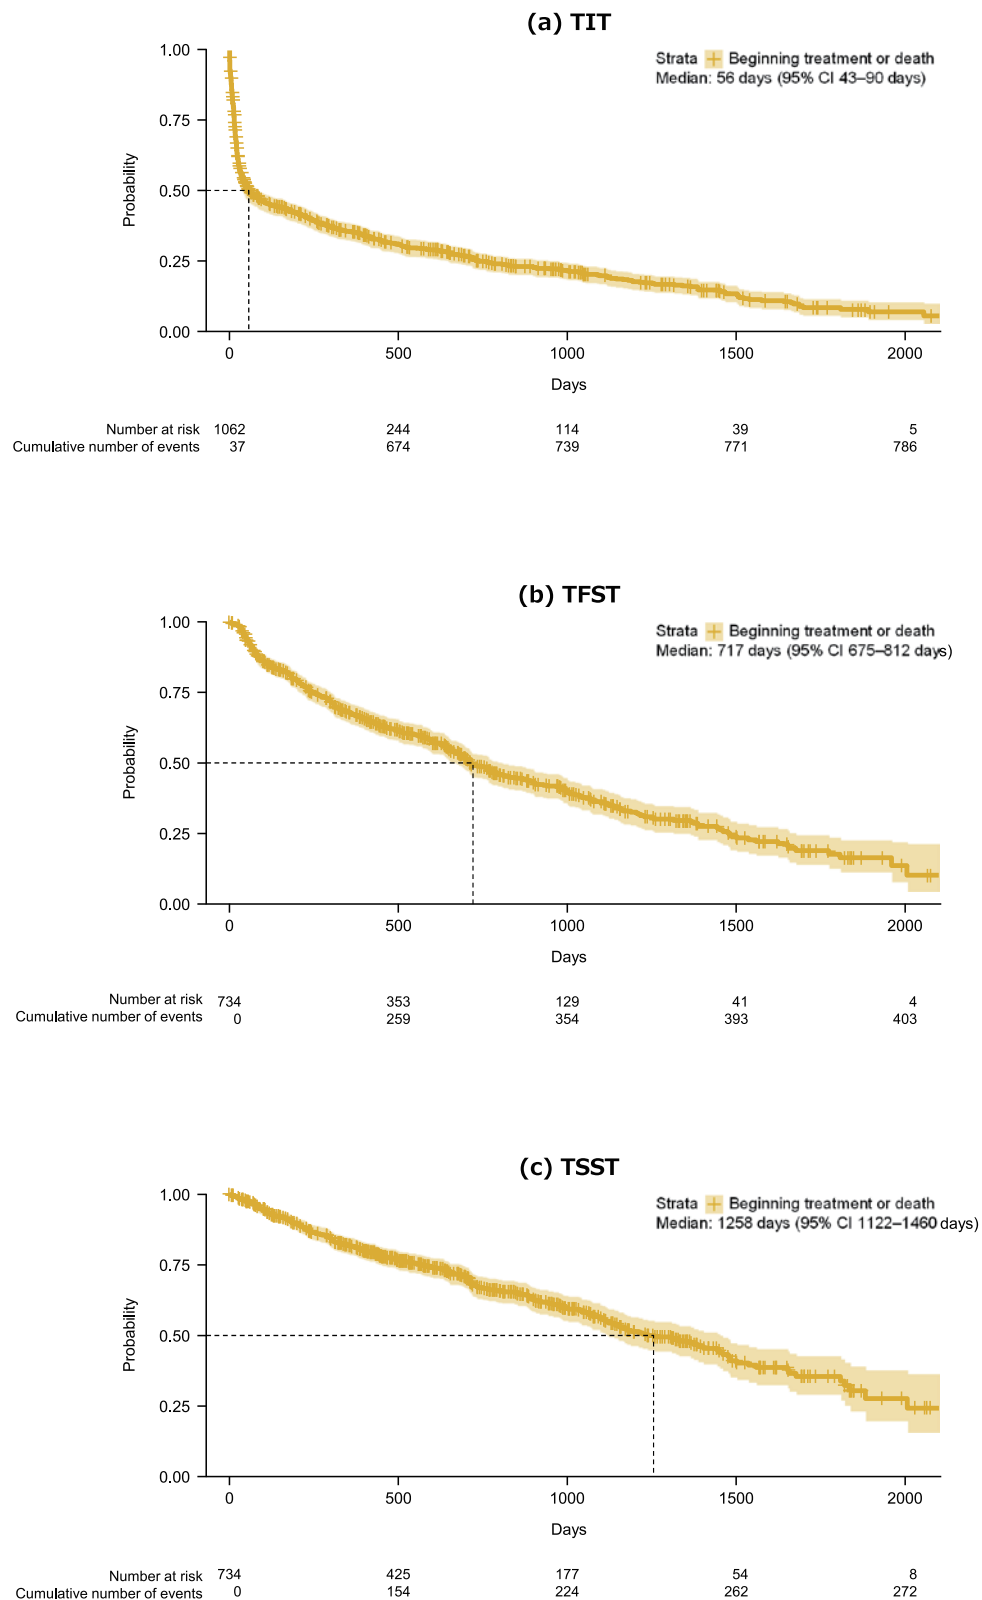

**Supplementary Fig. S1.** Kaplan–Meier plots of TIT (a), TFST (b), and TSST (c) in patients who did not undergo stem cell transplantation during the follow-up period. TIT was calculated as the time from the index date (date of first MCL diagnosis) to the first prescribed antineoplastic treatment. TFST and TSST were calculated as the time from the first prescription to the prescription of second-line (TFST) or third-line (TSST) treatments. TIT, time to initial (i.e., first-line) treatment; TFST, time to first-subsequent (i.e., second-line) treatment; TSST, time to second-subsequent (i.e., third-line) treatment

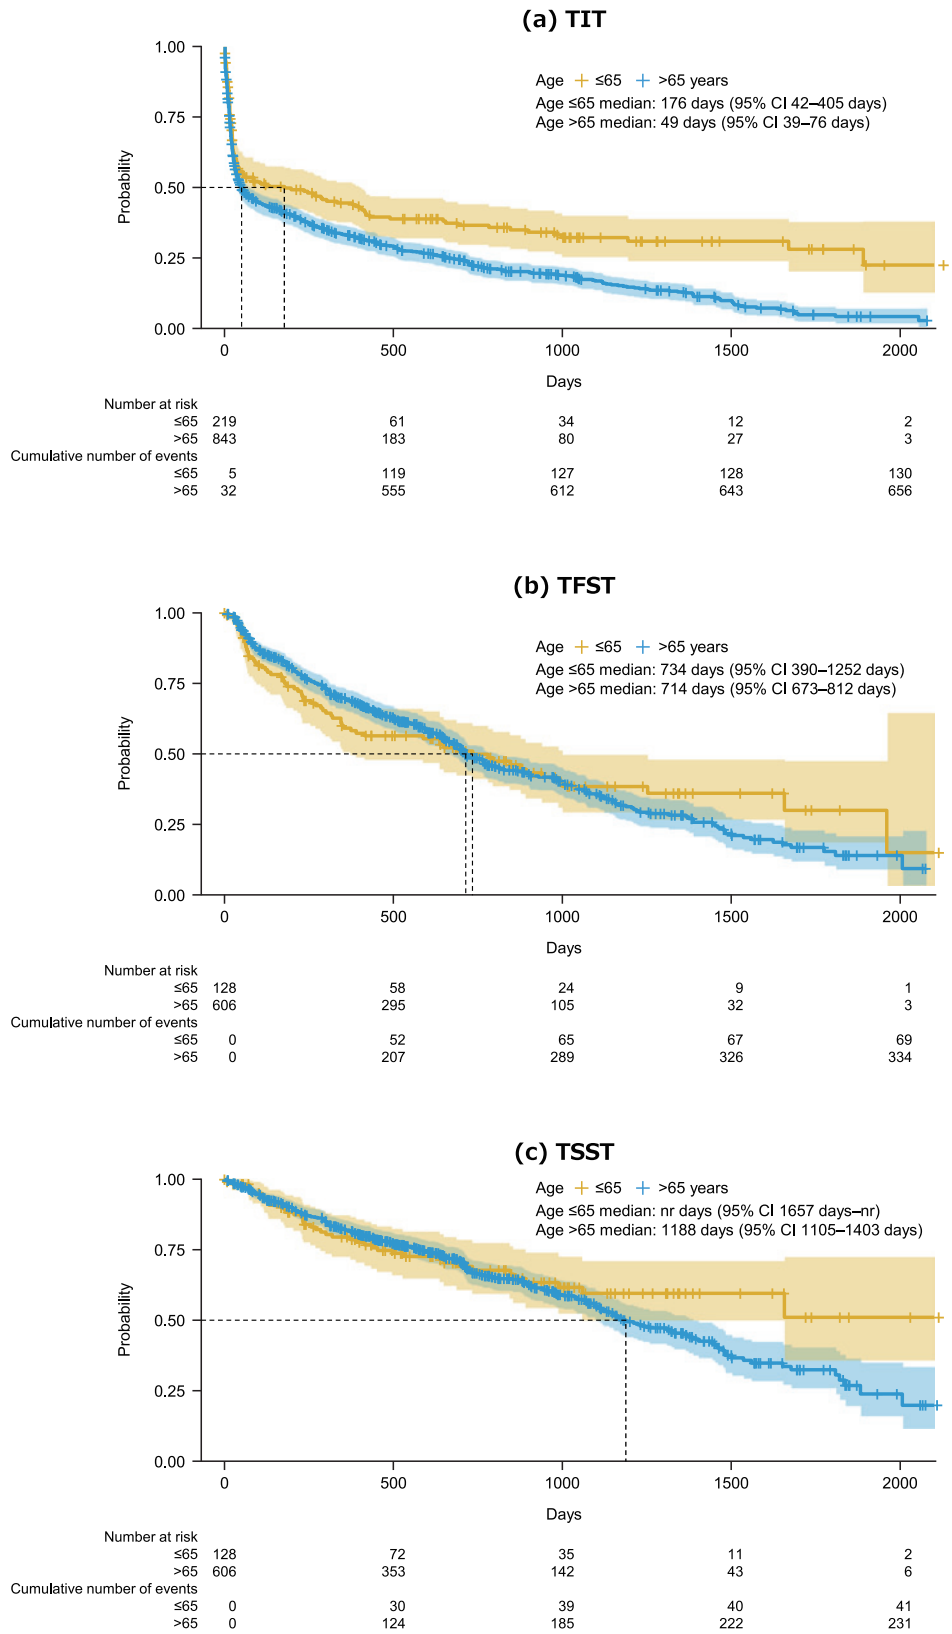

**Supplementary Fig. S2.** Kaplan–Meier plots of TIT (*a*), TFST (*b*), and TSST (*c*) in patients who did not undergo stem cell transplantation during the follow-up period stratified by age at the index date ( $\leq 65$  or  $> 65$  years). TIT was calculated as the time from the index date (date of first MCL diagnosis) to the first prescribed antineoplastic treatment. TFST and TSST were calculated as the time from the first prescription to the prescription of second-line (TFST) or third-line (TSST) treatments. TIT, time to initial (i.e., first-line) treatment; TFST, time to first-subsequent (i.e., second-line) treatment; TSST, time to second-subsequent (i.e., third-line) treatment
